# Supplementary material for: Gradient band gap engineered alloyed quaternary/ternary CdZnSeS/ZnSeS quantum dots: an ultrasensitive fluorescence reporter in a conjugated molecular beacon system for the biosensing of influenza virus RNA
Source: Royal Society of Chemistry journal article supplement (doi:10.1039/c5tb02449h), 2016-01-01
Supplement: c5tb02449h1.pdf [file c5tb02449h1.pdf]

## SUPPLEMENTARY INFORMATION

# Gradient band gap engineered alloyed quaternary/ternary CdZnSeS/ZnSeS quantum dots: An ultrasensitive fluorescence reporter in a conjugated molecular beacon system for the biosensing of influenza virus RNA

Oluwasesan Adegoke,<sup>†</sup> Min-Woong Seo,<sup>‡</sup> Tatsuya Kato,<sup>†,§</sup> Shoji Kawahito,<sup>‡</sup> Enoch Y. Park<sup>1,†,§</sup>

<sup>†</sup> *Laboratory of Biotechnology, Research Institute of Green Science and Technology, Shizuoka University, 836 Ohya, Suruga-ku, Shizuoka 422-8529, Japan*

<sup>‡</sup> *Imaging Devices Laboratory, Research Institute of Electronics, Shizuoka University, Johoku 3-5-1, Naka-ku, Hamamatsu 432-8011, Japan*

<sup>§</sup> *Laboratory of Biotechnology, Department of Bioscience, Graduate School of Science and Technology, Shizuoka University, 836 Ohya, Suruga-ku, Shizuoka 422-8529, Japan*

E-mail:

adegoke.sesan@mailbox.co.za (OA)

mwseo@idl.rie.shizuoka.ac.jp (MS)

kawahito@idl.rie.shizuoka.ac.jp (SK)

kato.tatsuya@shizuoka.ac.jp (TK)

park.enoch@shizuoka.ac.jp (EYP)

---

<sup>1</sup> Corresponding author: [park.enoch@shizuoka.ac.jp](mailto:park.enoch@shizuoka.ac.jp) (EYP)  
Electronic supplementary information (ESI) available.

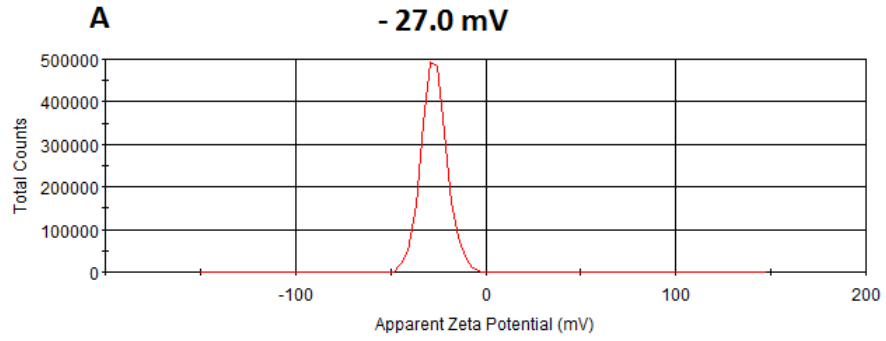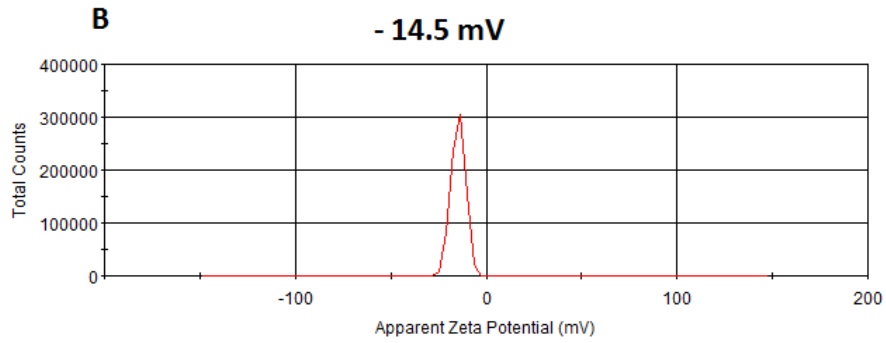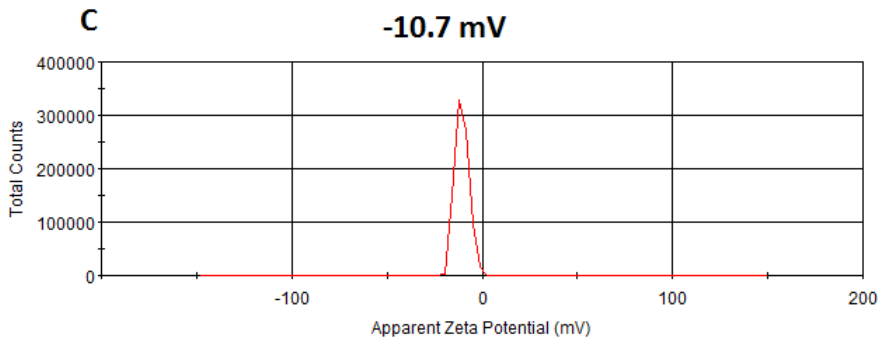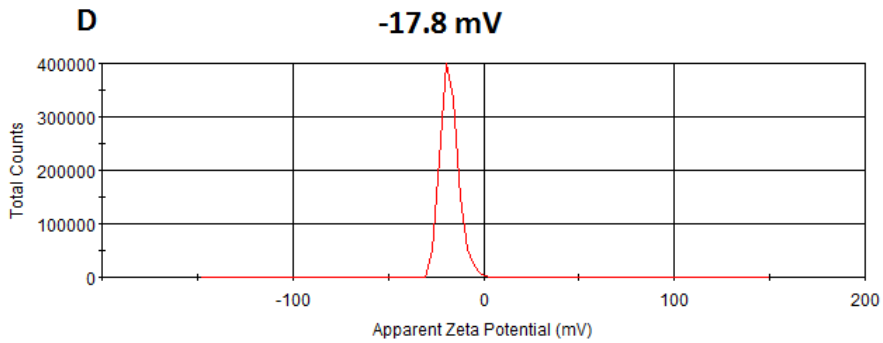

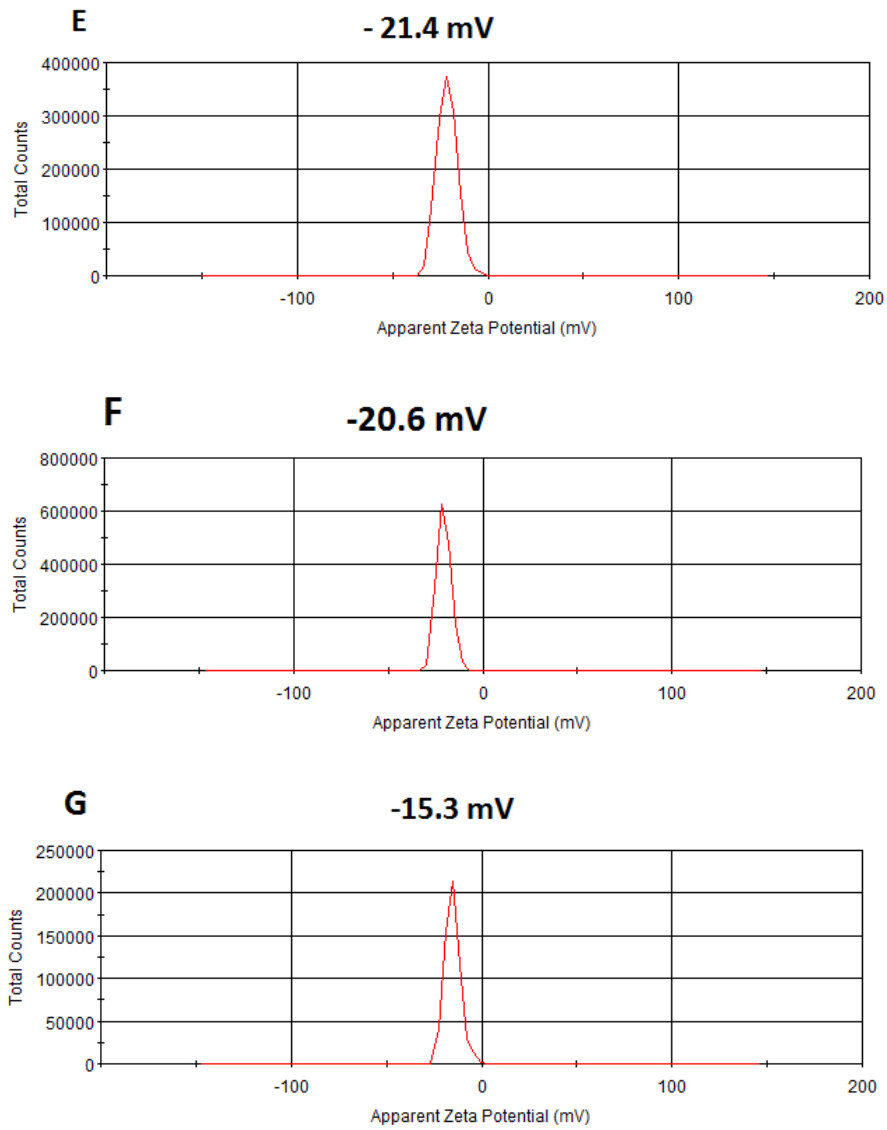

**Fig. S-1.** Zeta potential curves for alloy TGA-capped (A) CdZnSeS, (B) CdZnSeS/ZnSe<sub>1.0</sub>S<sub>1.3</sub>, (C) CdZnSeS/ZnSe<sub>1.0</sub>S<sub>1.4</sub>, (D) CdZnSeS/ZnSe<sub>1.0</sub>S<sub>1.5</sub>, (E) CdZnSeS/ZnSe<sub>1.0</sub>S<sub>1.6</sub>, (F) CdZnSeS/ZnSe<sub>1.0</sub>S<sub>1.7</sub> and (G) CdZnSeS/ZnSe<sub>1.0</sub>S<sub>1.8</sub> QDs.

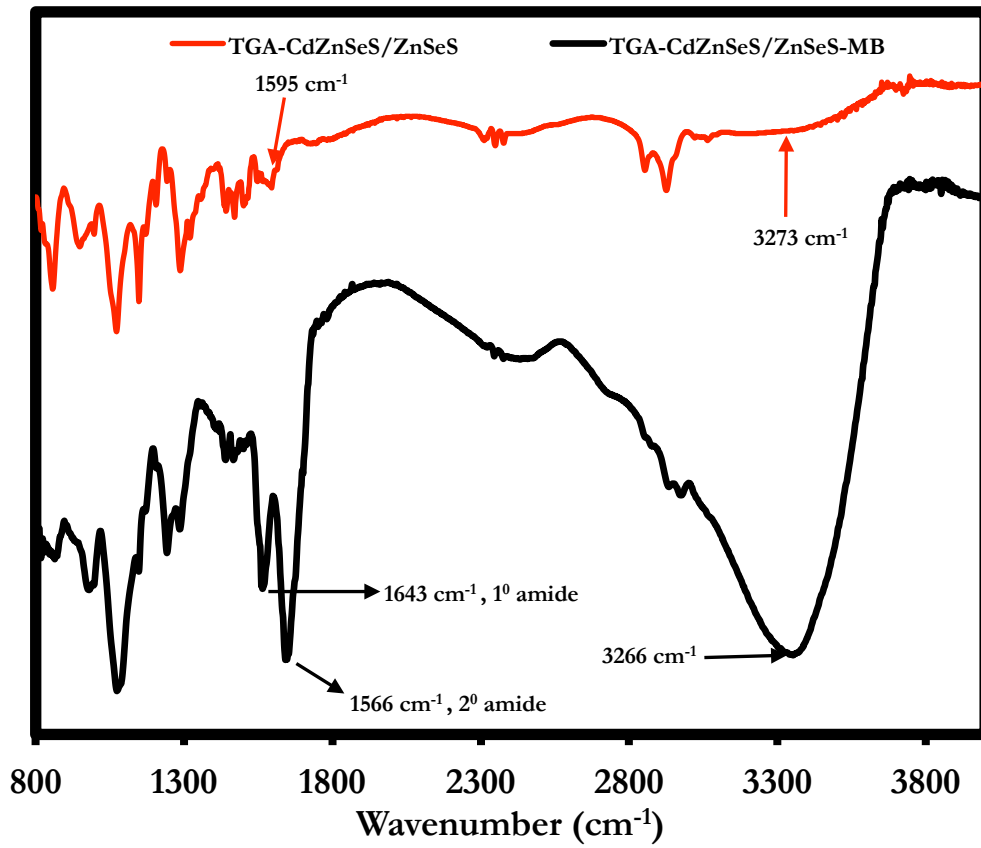

Fig. S-2. FT-IR spectra of the unconjugated QDs and the QD-MB bioprobe.
